# Supplementary material
Source: PubMed Central journal article supplement (PMC4870609)
Supplement: Supp_Figure2.pdf [file Supp_Figure2.pdf]

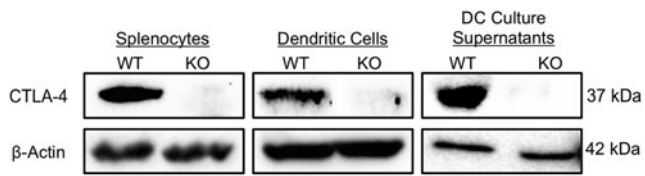

**SUPPLEMENTARY FIG. S2.** Analysis of cells derived from CTLA-4<sup>-/-</sup>CD28<sup>-/-</sup> double knockout mice confirms expression of CTLA-4 in murine DC. Splenocytes, BMDC, and BMDC culture supernatants were generated from wild-type and CTLA-4<sup>-/-</sup>CD28<sup>-/-</sup> double knockout mice and then analyzed for CTLA-4 content by western blot analysis. Anti-actin was used as a loading control. BMDC, bone marrow-derived dendritic cells.
