# Supplementary material
Source: PubMed Central journal article supplement (PMC4870609)
Supplement: Supp_Figure3.pdf [file Supp_Figure3.pdf]

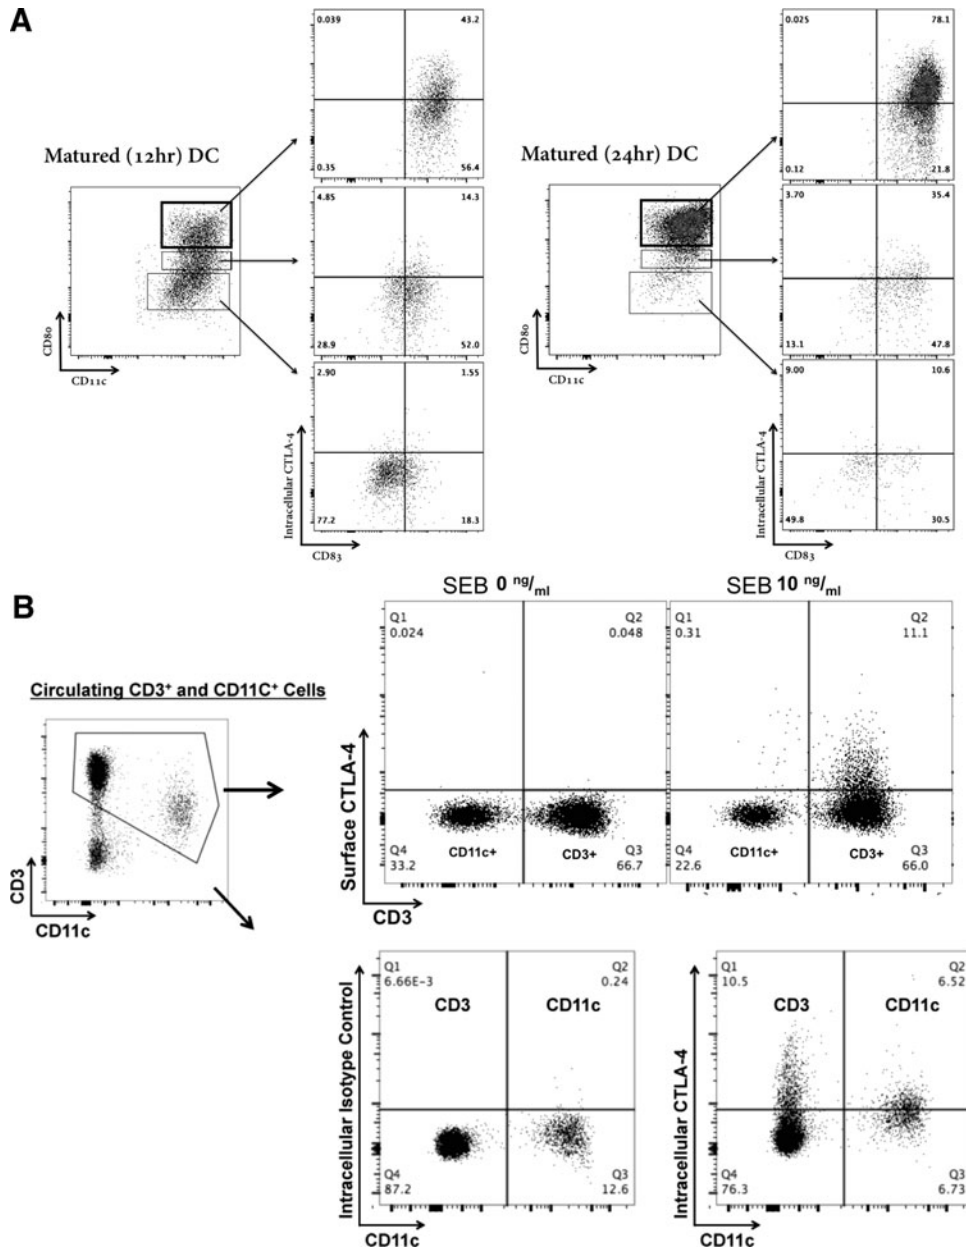

**SUPPLEMENTARY FIG. S3.** (A) Intracellular DC CTLA-4 is upregulated with increased DC maturation. Intracellular CTLA-4 levels were well correlated with relative maturity of the DC as measured by CD80 and CD83 expression. (B) Circulating human CD11c<sup>+</sup> cells physiologically express intracellular CTLA-4 in a pattern distinct from that of CD3<sup>+</sup> cells. Blood was collected from healthy volunteers and subsequently stained for CD11c, CD3, surface CTLA-4, and intracellular CTLA-4. Gating specifically on CD3<sup>+</sup> and CD11c<sup>+</sup> cells indicates that, while activation with SEB upregulates CTLA-4 expression on the CD3<sup>+</sup> subset (*top panel*), both subsets possess intracellular CTLA-4 (*bottom panel*). Basal levels of intracellular CTLA-4 were higher in CD11c<sup>+</sup> cells than in unactivated CD3<sup>+</sup> cells.
