# Supplementary material
Source: PubMed Central journal article supplement (PMC4870609)
Supplement: Supp_Figure4.pdf [file Supp_Figure4.pdf]

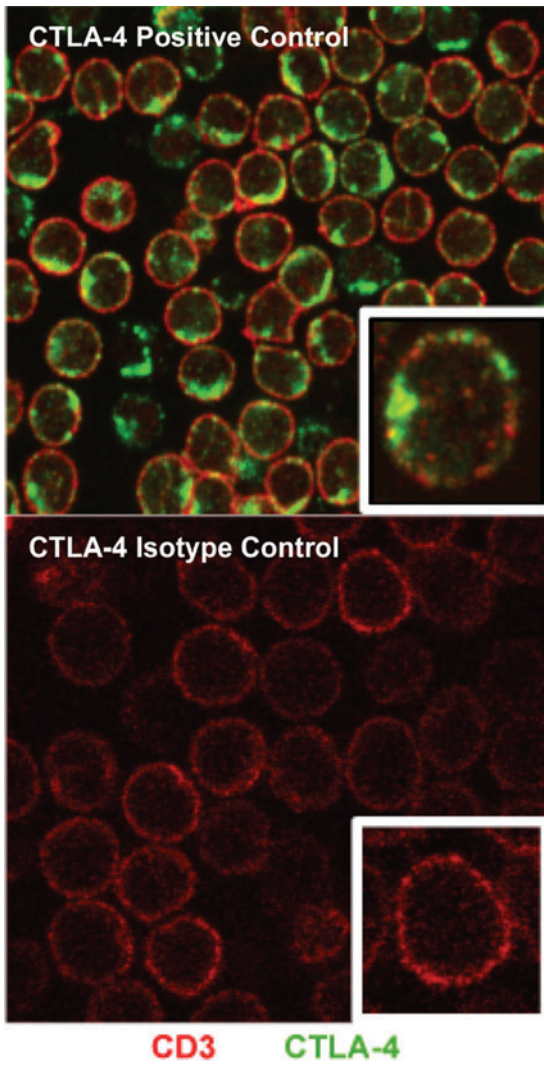

**SUPPLEMENTARY FIG. S4.** Validation of  $\alpha$ CTLA-4 antibody specificity. T cells were stained with either  $\alpha$ CTLA-4 or isotype control antibody and analyzed by confocal microscopy to confirm  $\alpha$ CTLA-4 antibody specificity.
