# Supplementary material
Source: PubMed Central journal article supplement (PMC4870609)
Supplement: Supp_Figure6.pdf [file Supp_Figure6.pdf]

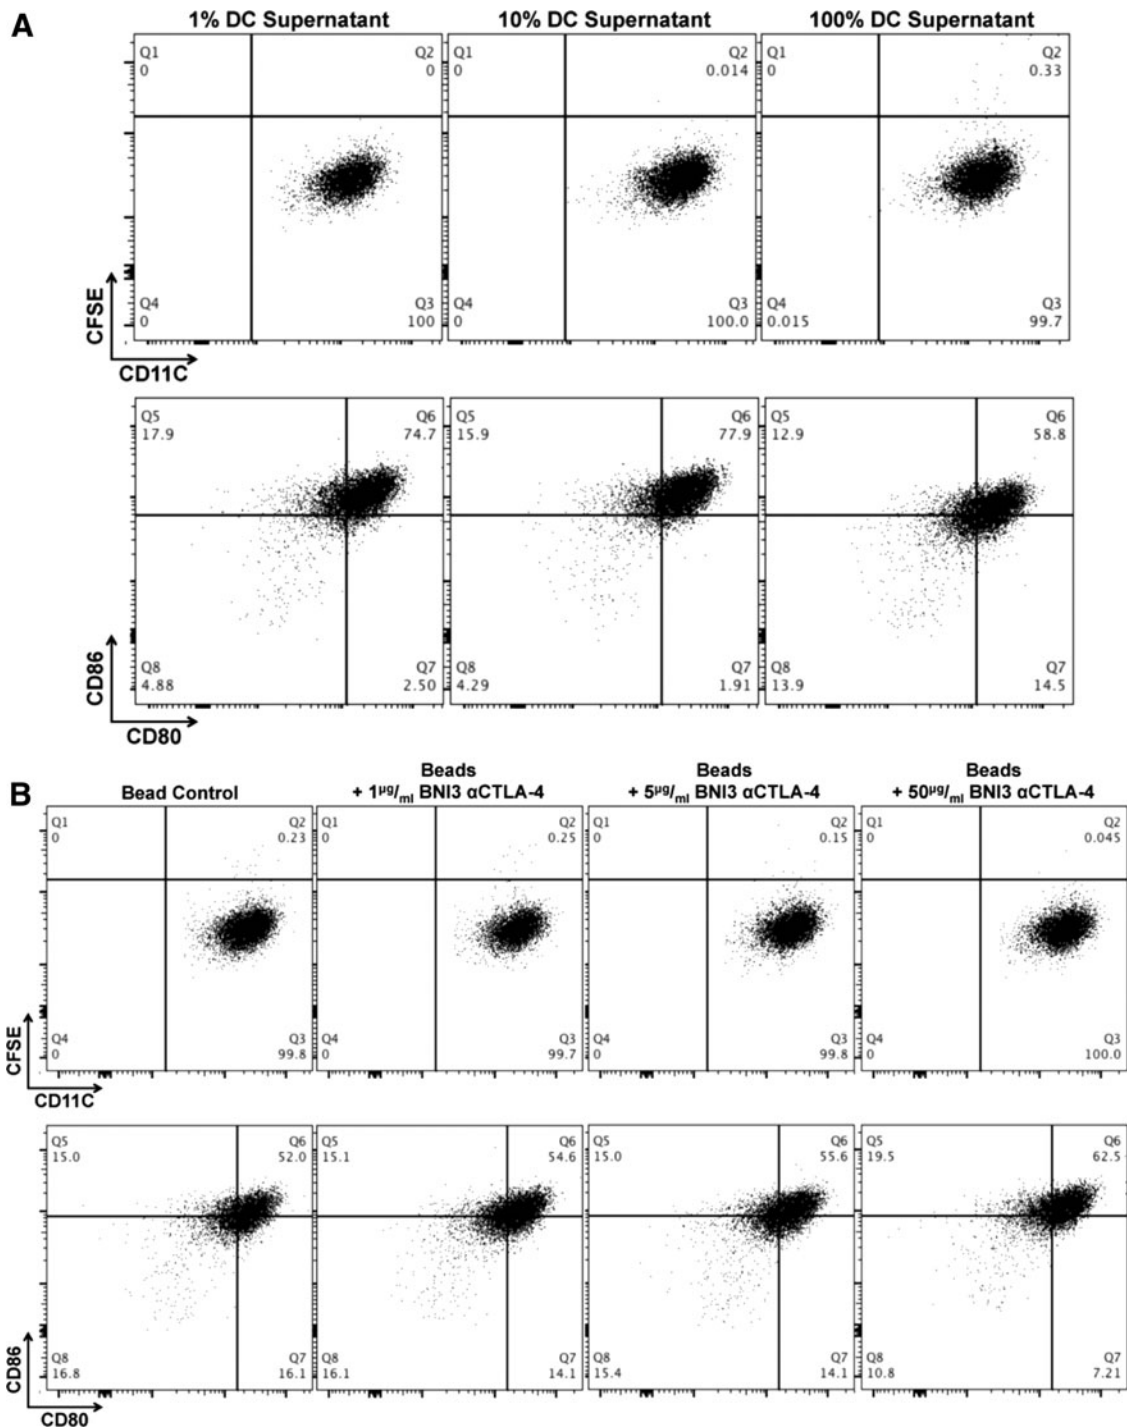

**SUPPLEMENTARY FIG. S6.** DC-EV CTLA-4 physiologically bind B7. (A) CFSE-loaded DC culture supernatants were serially diluted with fresh media and incubated with unlabeled DC for 20 min at 4°C along with  $\alpha$ CD80 and  $\alpha$ CD86 flow-qualified antibodies and 0.1% sodium azide. (B) Similar to Fig. 4D and E, cultured CFSE-loaded DC supernatants were incubated for 1 h with protein G-plus beads coated with various concentrations of  $\alpha$ CTLA-4. The beads were pelleted and cleared supernatants were incubated with unlabeled DC for 20 min at 4°C along with  $\alpha$ CD80 and  $\alpha$ CD86 flow-qualified antibodies and 0.1% sodium azide. CD11c was used as a non-B7 control. EV, extracellular vesicles.
