# Supplementary material
Source: PubMed Central journal article supplement (PMC4870609)
Supplement: Supp_Figure7.pdf [file Supp_Figure7.pdf]

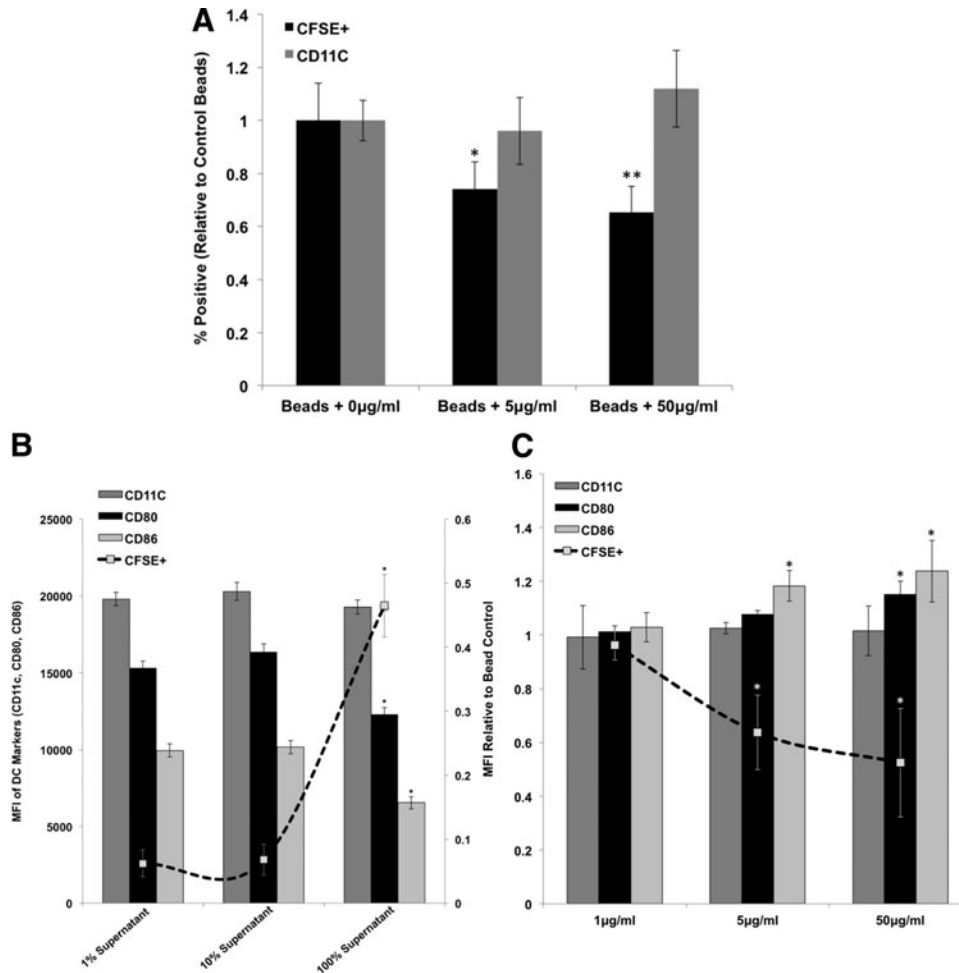

**SUPPLEMENTARY FIG. S7.** (A) Quantitation of Fig. 4D—Incubation of DC culture supernatants with  $\alpha$ CTLA-4-coated beads blocks subsequent uptake of CFSE-labeled EV by unlabeled DC. Incubation of DC culture supernatants with  $\alpha$ CTLA-4-coated beads blocked the subsequent uptake of CFSE-labeled EV by unlabeled DC in a titratable manner. At an antibody concentration of 5  $\mu$ g/mL, 26% fewer recipient DC internalized CFSE<sup>+</sup> EV (\* $P$  < 0.05), whereas at an antibody concentration of 50  $\mu$ g/mL, 35% fewer recipient DC internalized CFSE<sup>+</sup> EV (\*\* $P$  < 0.01). Staining of CD11c internal control was not statistically different between groups. Error bars =  $\pm$ SD of three independent experiments. (B) Quantitation of S6A—DC-EV CTLA-4 physiologically binds B7. In three experiments, incubation of unlabeled recipient DC with cell culture supernatants derived from CFSE-labeled DC for 20 min at 4°C along with  $\alpha$ CD80 and  $\alpha$ CD86 flow-qualified antibodies and 0.1% sodium azide resulted in no change in B7 MFI using 1% or 10% supernatant (as well as no detectable uptake of CFSE<sup>+</sup> vesicles); however, in 100% supernatant, CD80 MFI and CD86 MFI were both significantly reduced as CFSE uptake quintupled. There was no statistical difference in CD11c MFI among any of the dilutions. \* $P$  < 0.05. Error bars =  $\pm$ SD. (C) Quantitation of S6B—DC-EV CTLA-4 physiologically binds B7. In three experiments, preclearance of CFSE-labeled DC culture supernatants with  $\alpha$ CTLA-4 beads for 1 h before incubation of unlabeled DC for 20 min at 4°C along with  $\alpha$ CD80 and  $\alpha$ CD86 flow-qualified antibodies and 0.1% sodium azide resulted in a titratable and statistically significant increase in B7 MFI with no concomitant increase in CD11c MFI, while percentage of CFSE<sup>+</sup> cells dropped 45%. \* $P$  < 0.05. Error bars =  $\pm$ SD. (B, C) Dashed line, percentage of CFSE<sup>+</sup> cells.
